# Supplementary material
Source: Springer Nature journal article supplement (https://www.springermedizin.de/resource/supplementary/12986_2010_269_MOESM4_ESM.pdf/25655722)

**A**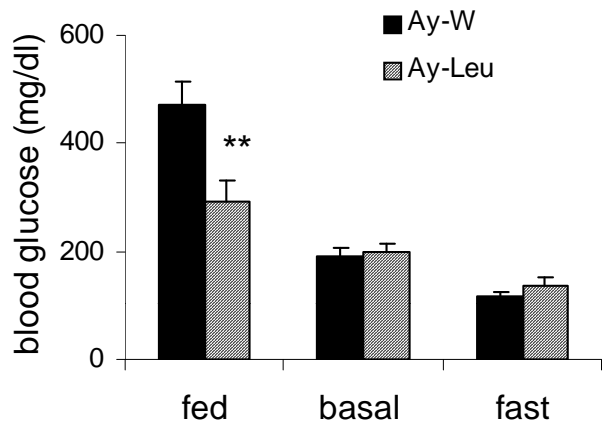**B**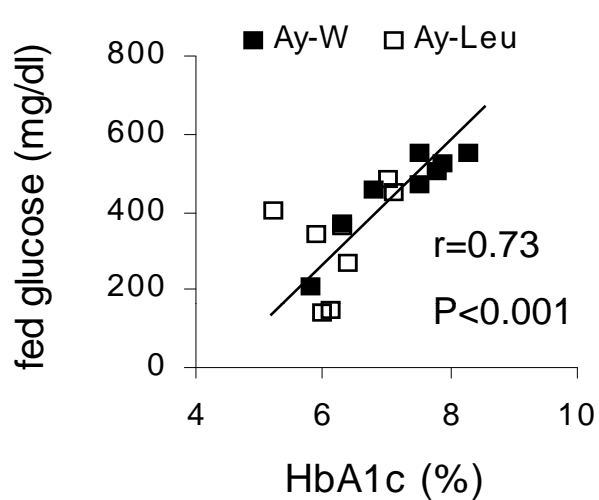**C**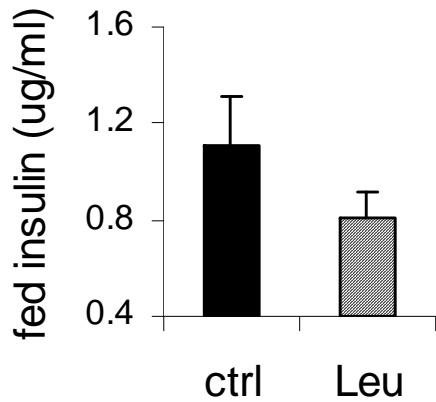**D**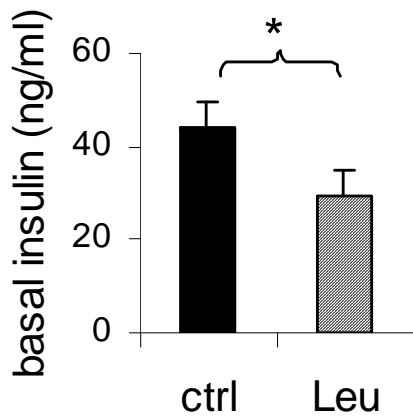**E**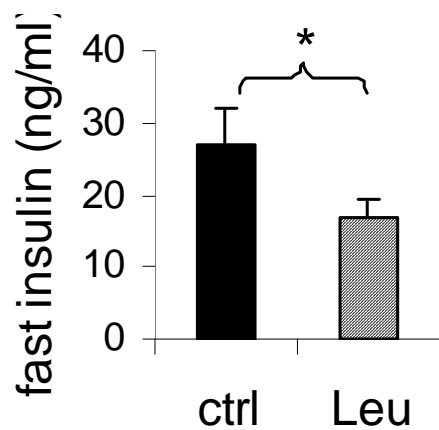

Supplement: MOESM4 [file 25655722]
